# Supplementary material for: Development of a fluorescent distance-based paper device using loop-mediated isothermal amplification to detect Escherichia coli in urine
Source: Royal Society of Chemistry journal article supplement (doi:10.1039/d0an01306d), 2020-01-01
Supplement: d0an01306d1.pdf [file d0an01306d1.pdf]

## Supplementary

1

2

3

4 **Development of fluorescent distance-based paper device using loop-mediated isothermal**  
5 **amplification to detect *Escherichia coli* in urine**

6

7

8 Natkrittaya Saengsawang,<sup>a</sup> Toon Ruang-areerate,<sup>b,\*</sup> Piyanate Kesakomol,<sup>c</sup> Thunyapit Thita,<sup>d</sup>  
9 Mathirut Mungthin,<sup>b</sup> and Wijitar Dungchai<sup>a,\*\*</sup>

10

11

12

13 a) Analytical Chemistry, Department of Chemistry, Faculty of Science, King Mongkut's  
14 University of Technology Thonburi

15 b) Department of Parasitology, Phramongkutklao College of Medicine

16 c) Department of Microbiology, Phramongkutklao College of Medicine

17 d) Drug Research Unit for Malaria, Faculty of Tropical Medicine, Mahidol University

18

19

20

21

22 *Corresponding authors: \*Asst. Prof. Dr. Toon Ruang-areerate and \*\*Asst. Prof. Dr. Wijitar Dungchai*

23 *\*E-mail: youangtr@yahoo.com; Fax: +66-2-354-7761; Tel: +66-2-354-7761*

24 *\*\*E-mail: wijitar.dun@kmutt.ac.th; Fax: +66-2-470-8840; Tel: +66-2-470-9553*

25

26

27

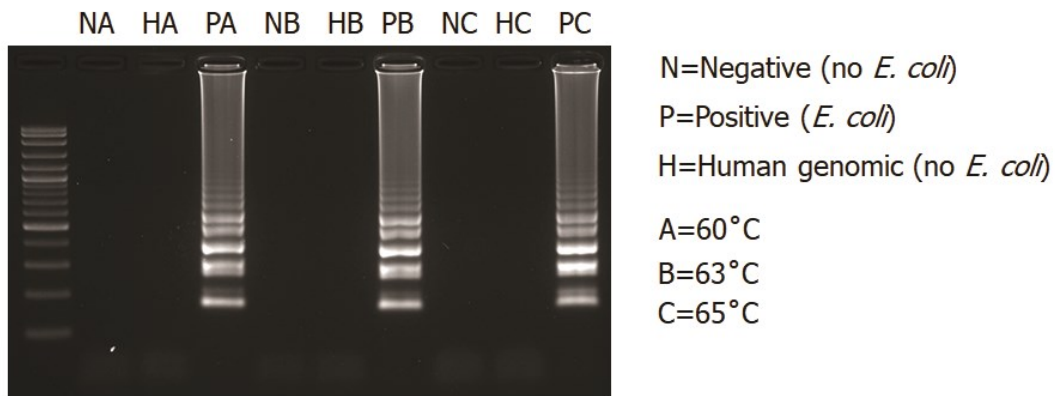

28

29 **Fig S1.** The amplification of LAMP products at different incubation temperatures observed  
30 by agarose gel electrophoresis: negative, no *E. coli* DNA control; positive,  $10^6$  CFU mL<sup>-1</sup> of  
31 *E. coli* DNA

32

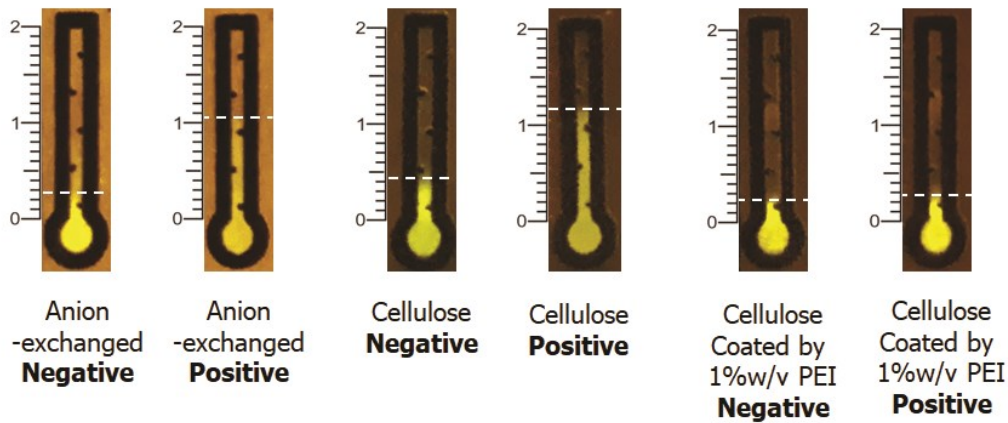

33

34 **Fig S2.** The detection of LAMP assay using distance-based paper device by using different  
35 type of paper (anion-exchanged paper, cellulose and cellulose coated by 1%w/v PEI):  
36 negative, no *E. coli* DNA control; positive,  $10^4$  CFU mL<sup>-1</sup> of *E. coli* DNA.
